# 1 Sex and estrous cycle affect experience-dependent plasticity in mouse primary 2 visual cortex

3

## 4 Authors

5 Rachel W. Schechter<sup>1\*</sup>, Cambria M. Jensen<sup>1\*</sup>, and Jeffrey P. Gavornik<sup>1</sup>

6

## 7 Institutional Affiliations

8 <sup>1</sup>Biology Department, Boston University, Boston, MA

9 \*Authors contributed equally to the work

10

11 Corresponding author: Jeffrey P. Gavornik, [gavornik@bu.edu](mailto:gavornik@bu.edu)

12

13

## 14 Abstract

15 Sex hormones can affect cellular physiology and modulate synaptic plasticity, but it is not  
16 always clear whether or how sex-dependent differences identified *in vitro* express themselves as  
17 functional dimorphisms in the brain. Historically, most experimental neuroscience has been  
18 conducted using only male animals and the literature is largely mute about whether including  
19 female mice in will introduce variability due to inherent sex differences or endogenous estrous  
20 cycles. Though this is beginning to change following an NIH directive that sex should be  
21 included as a factor in vertebrate research, the lack of information raises practical issues around  
22 how to design experimental controls and apply existing knowledge to more heterogeneous  
23 populations. Various lines of research suggest that visual processing can be affected by sex and  
24 estrous cycle stage. For these reasons, we performed a series of *in vivo* electrophysiological  
25 experiments to characterize baseline visual function and experience-dependent plasticity in the  
26 primary visual cortex (V1) of male and female mice. We find that sex and estrous stage have no  
27 statistically significant effect on baseline acuity measurements, but that both sex and estrous  
28 stage have can modulate two mechanistically distinct forms of experience dependent cortical  
29 plasticity. We also demonstrate that resulting variability can be largely controlled with  
30 appropriate normalizations. These findings suggest that V1 plasticity can be used for mechanistic  
31 studies focusing on how sex hormones effect experience dependent plasticity in the mammalian  
32 cortex.

33

34

## 35 Acknowledgements

36 We thank Mike Baum for his advice in designing these experiments, and Lisa Stowers and  
37 Sandeepa Dey for their advice and technical support related to estrous staging. We are grateful to  
38 Elizabeth de Laittre for technical support.

## 39 **Introduction**

40 In May of 2014, the NIH released a directive that sex must be factored into research of vertebrate  
41 animals (Clayton and Collins, 2014). In support of the NIH statement, Shansky and Woolley  
42 advise researchers to “accept [sex differences] as part of a complex physiological background”  
43 of each animal (Shansky and Woolley, 2016). This statement minimizes the impact that  
44 variability associated with a heterogeneous “physiological background” could have on  
45 neuroscience research, where a variety of factors that can affect brain function – handling, cage  
46 mate socialization, etc. – are difficult to measure and control. Unlike other fields of biology,  
47 systems-level neuroscience research often lacks valid *ex vivo* models that could mitigate these  
48 factors. Neuroscientists have been hesitant to include female animals in their research since sex  
49 chromosomes and gonadal hormones represent two sources of potentially serious variance. Some  
50 have raised concerns that the broad inclusion of female animals in preclinical experiments will  
51 not produce desired outcomes but may have unintended consequences of “wasting resources,  
52 slowing down research or even provoking a backlash” (Fields, 2014; Richardson et al., 2015).  
53 As a consequence of these considerations, there is a 5:1 bias towards male-only neuroscience  
54 studies, the highest in all fields measured (Beery and Zucker, 2011).

55 Brain research must overcome this experimental inertia both as a practical matter (i.e. to  
56 comply with the NIH directives) and to address substantive critiques of building biological  
57 science around male animals alone. A major hurdle is the assumption that the estrous cycle  
58 introduces variability in both behavioral and physiological measures of neural function (Mogil  
59 and Chanda, 2005). While several recently published meta-analyses suggest this concern may be  
60 overblown in rodents (Prendergast et al., 2014; Becker et al., 2016; Fritz et al., 2017), there is  
61 also good reason to take this concern seriously: chromosomal and hormonal effects do lead to

62 clear differences between females and males that can be seen at multiple levels and can impact a  
63 variety of functions including cognitive and emotional responses, learning and memory, and  
64 degree of severity in a variety of neurological disorders resulting from injury or pathology (Jazin  
65 and Cahill, 2010; McCarthy et al., 2012).

66 Plasticity experiments are particularly susceptible to hormonal cycle influences due to the  
67 variety of receptor types and signaling cascades that can be altered by fluctuating  
68 neuromodulator activity. For example, estrogen modulates NMDAR subunit expression in the  
69 hippocampus (Gazzaley et al., 1996; Cyr et al., 2001), changes spine density (Gould et al., 1990;  
70 Woolley and McEwen, 1992), and can enhance LTP (Warren et al., 1995; Scharfman et al.,  
71 2003). While there is scant direct evidence for or against sexual dimorphism in sensory cortices,  
72 estrogen has been demonstrated to modulate spine density in the imprecisely defined  
73 “sensorimotor cortex” (Chen et al., 2009) and nitric oxide synthase knockout in primary  
74 somatosensory cortex affects experience-dependent plasticity in male but not female animals  
75 (Dachtler et al., 2012). Sex differences in V1 have not been directly demonstrated *in vivo*, but  
76 there are several reasons to expect they exist. Human studies have shown that various aspects of  
77 visual perception correlate with fluctuating estrogen levels over the menstrual cycle, including  
78 visual memory and spatiotemporal processing (Phillips and Sherwin, 1992; Penton-Voak et al.,  
79 1999; Resnick and Maki, 2001). *In vitro* animal work has demonstrated that neuromodulators  
80 can fundamentally change the form of LTP/LTD induction curves in V1 neurons (switching, for  
81 example, whether a particular stimulation pattern results in LTP or LTD) (Huang et al., 2012;  
82 Huang et al., 2013), 7 $\alpha$ -Estradiol can promote experience-dependent plasticity in rat V1  
83 (Sengupta et al., 2019), and mouse V1 is sensitive to estrogen (Jeong et al., 2011) which plays a  
84 role in V1 homeostatic plasticity (Gao et al., 2017). These findings highlight the importance of

85 determining whether sex and estrous cycles impact V1 function *in vivo*. One thing to note is that  
86 nearly all of the work linking estrogen to plasticity was performed *in vitro* or by artificially  
87 administering estrogen to gonadectomized animals. As such, the literature provides essentially  
88 no information on the extent to which endogenous sex-based variations exist in sensory cortex or  
89 how to control for them if they exist.

90 For all these reasons, we set out to quantify the impact of sex and endogenous hormone  
91 fluctuations caused by the estrous cycle on baseline function and experience-dependent plasticity  
92 in the primary visual cortex. We measure no significant difference in visual acuity limits  
93 between male and female animals. We find that sex has no significant effect on a form of spatial  
94 coding called stimulus-selective response potentiation (SRP) (Frenkel et al., 2006; Cooke and  
95 Bear, 2012), but it does affect spatiotemporal sequence potentiation (Gavornik and Bear, 2014).  
96 We also tracked estrous cycling in a parallel set of experiments conducted exclusively in female  
97 mice and determined that estrous stage has no impact on our measurements of physiological  
98 function but can modulate plasticity coding both spatial and spatiotemporal information. Our  
99 results show that these effects can be effectively controlled for in some circumstances using in-  
100 group normalization and suggest mouse V1 as an *in vivo* model system to study how sex  
101 hormones affect mechanistically distinct forms of cortical plasticity and learning.

102

## 103 **Materials and Methods**

104

### 105 *Mice*

106 All procedures involving laboratory animals occurred at Boston University and adhered to the  
107 guidelines of the National Institutes of Health and were approved by the Institutional Animal

108 Care and Use Committee at BU, Boston, MA, USA. Mice were housed in groups of 2-5  
109 separated by sex with food and water available *ad libitum* and maintained on a 12-hour light-  
110 dark cycle. All animals were C57BL6 WT ordered from Charles River or C57BL6 WT progeny  
111 of heterozygous breeding pairs of VGAT-ChR2-EYFP transgenic mice (Jax stock #014548),  
112 Thy1-GCaMP6f transgenic mice (Jax stock #024276), or DAT-IRES-CRE transgenic mice (Jax  
113 stock #006660), genotyped by Transnetyx using real-time PCR for the EYFP, EGFP, and CRE  
114 genes, respectively; only animals which lacked transgene expression and tested positive for the  
115 corresponding WT control were used in experiments.

116

### 117 *Estrous staging*

118 For estrus/diestrus grouped experiments: female mice 8 weeks and older were analyzed daily as  
119 described in (Dey et al., 2015). Animals were encouraged to grip onto the cage lid with their  
120 front forepaws and held at the base of the tail with the thumb and forefinger, using the middle  
121 and ring fingers loosely flanking the mouse's torso underneath the rib cage. Direct cytology was  
122 performed with tissue collected via vaginal lavage of fifteen microliters of sterile PBS, and wet  
123 mount slides were examined with phase contrast microscopy. Smears were classified (with  
124 reference to (Byers et al., 2012) as follows: estrus - a predominance of cornified epithelial cells,  
125 metestrus - a mix of cornified epithelial and leukocyte cells, diestrus – a predominance of  
126 leukocyte cells, and proestrus – a predominance of nucleated epithelial cells (see **Figure 2**).  
127 Once mice had completed at least one cycle through all four stages and were at the height of  
128 either estrus (100% cornified cells) or diestrus (100% leukocyte cells) they were included in  
129 experimental groups as yoked pairs.

130

131 *VEP Surgery*

132 Electrode implantation followed the procedures used in previous studies (Porciatti et al., 1999;  
133 Sawtell et al., 2003). Mice were first injected with 0.1 mg/kg Buprenex sub-cutaneously to  
134 provide analgesia. They were then anesthetized with 1.5-3% isoflurane. The scalp was shaved  
135 and cleaned with iodine and 70% ethanol before an incision was made to expose the skull. A  
136 steel head post was affixed to the skull anterior to bregma using cyanoacrylate glue. Burr holes  
137 (< 0.5 mm) were then drilled in the skull over binocular V1 (3.0 mm lateral of lambda). Tapered  
138 tungsten recording electrodes (FHC, Bowdoinham, ME, US), 75 µm in diameter at their widest  
139 point, were implanted in each hemisphere 450 µm below the cortical surface to target  
140 thalamocortical recipient layer 4. Silver wire (A-M systems, Sequim, WA, US) was placed in the  
141 cerebrospinal fluid over prefrontal cortex to serve as an electrical reference. Mice were allowed  
142 to recover for at least 48 hours prior to initial head-fixation.

143

144 *In vivo electrophysiology*

145 VEP recordings were conducted in awake, head-restrained mice. Prior to recording, mice were  
146 habituated to the restraint apparatus *in situ* in front of a gray screen for a 30-minute session on  
147 each of two consecutive days. All data was amplified and digitized using the commercially  
148 available OmniPlex recording system (Plexon Inc., Dallas TX). Data was acquired at 25 kHz and  
149 local field potentials (LFPs) were down-sampled to 1-kHz utilizing a 500-Hz low-pass anti-  
150 aliasing filter. Data was extracted from the binary storage files and analyzed using custom  
151 software written in C++ and Matlab (MathWorks, Natick, MA, all stimulus generation and  
152 analysis code is available for download at [https://gavorniklab.bu.edu/supplemental-](https://gavorniklab.bu.edu/supplemental-materials.html)  
153 [materials.html](https://gavorniklab.bu.edu/supplemental-materials.html)). Each animal was implanted with an electrode in both the left and right

154 hemisphere. When electrodes produced a clear and comparable VEPs bilaterally, both  
155 hemisphere's responses were averaged together. Otherwise, we used data from the hemisphere  
156 with the largest VEP (in all cases, the same hemisphere was used for all recording sessions).  
157 VEPs were quantified by algorithmic scoring of the peak-to-peak voltage swing following a  
158 visual stimulus event. Sequence magnitudes are defined as the average peak-to-peak response  
159 magnitude for the second and third elements of the sequence, either B-C (trained) or C-B  
160 (novel).

161

### 162 *Stimulus delivery*

163 Visual stimuli were generated with custom software written in Matlab using the PsychToolbox  
164 extension (<http://psychtoolbox.org>) to control stimulus rendering and timing. A 27-inch  
165 widescreen monitor (Acer XB270HU) was positioned 20 cm in front of the mouse and centered  
166 so as to occupy the entire binocular region of visual space. Visual stimuli consisted of full-field  
167 sinusoidal grating utilizing the full range of monitor display values between black and white,  
168 with gamma-correction to ensure constant total luminance in both gray-screen and patterned  
169 stimulus conditions. For acuity experiments, animals were exposed to 200 phase reversals at  
170 each spatial frequency. Phase reversals occurred every 0.5 secs. SRP experiments used a grating  
171 with spatial frequency of 0.05 cycles per degree. A single "familiar" orientation was presented  
172 400 times on each training day, and a "novel" orientation was interleaved with the familiar  
173 stimulus on the test day. In Sequence Learning experiments, a sequence consisted of four  
174 elements of a full-screen, 100% contrast sinusoidal grating at 0.05 cycles per degree (each held  
175 on screen for 150 ms), followed by an inter-sequence gray period lasting 1.5 sec. Sequence  
176 elements differed by a minimum of 30 degrees and order was restricted to prevent the

177 appearance of rotation. During training, a single sequence was presented 200 times per day in  
178 four blocks of 50 presentations with each block separated by 30 sec. On the test day, blocks of a  
179 novel sequence (DCBA) were interleaved with the trained (ABCD) sequence.

180

### 181 *Experimental design and statistics*

182 All experiments comparing male and female mice were conducted using yoked littermates and  
183 blind to sex (though physical differences between male and female mice are sometimes  
184 apparent). Due to variations in stage onset and duration, it was not possible to fully yoke  
185 experimental groups in experiments addressing the effects of estrous cycling. These experiments  
186 were conducted on cage-mate animals, with staging and experiments occurring in parallel as  
187 much as possible. In all experiments, data was analyzed blind using a single common scoring  
188 algorithm.

189 All data are shown using population-averaged VEPs (e.g., the average stimulus-locked  
190 LFP) and violin plots of quantified VEP magnitudes. The shape of each violin indicates a kernel  
191 density estimates of the data (produced using the `ksdensity` function in Matlab's statistical  
192 toolbox) with mean values and data quartiles marked. To facilitate accurate comparisons, all  
193 violins on each individual plot were produced using a single bandwidth parameter chosen as the  
194 average of optimal values calculated for each individual data set on that plot. Statistical  $n$  values  
195 reported indicate the number of individual animals in each experimental group. SPSS was used  
196 for parametric statistical analysis. Unless otherwise noted, 2-way ANOVAs were used to  
197 determine the statistical impact of either sex or estrus stage on stimulus evoked VEP potentiation  
198 as a function of either training day or stimulus type and the Shapiro-Wilk test was used to  
199 confirm data normality. When main effects were significant, pairwise comparisons were



200 performed using the independent two-tailed t-test with Bonferroni correction for multiple  
201 comparisons. The sizes of experimental cohorts were planned based on previously published  
202 experiments and our own experience indicating 5-10 animals are required in each cohort to reach  
203 statistical significance with adequate power. We used post-hoc estimates to verify that all  
204 statistically significant effects had an observed power  $\geq 0.8$  for  $\alpha=0.05$  (true in all cases unless  
205 otherwise noted). In all cases, we planned the experiment using the minimum number of mice  
206 expected to be required to achieve significant results based on our expectation of attrition rates  
207 and effect sizes. Animals were excluded from the experiment only for electrode failure or as  
208 described in the text.

209

## 210 **Results**

211 *Female and male mice have comparable visual acuity which is unaffected by estrous cycle*

212 Our first set of experiments were designed to establish whether genomic differences during  
213 development result in any baseline functional differences in visual responsiveness between adult  
214 male and female mice. Visually evoked potentials (VEPs, calculated as the average stimulus-  
215 locked local field potential response) recorded in V1 can be used to assess visual function in  
216 mice and produce a quantitative metric that matches behavioral measures of visual acuity  
217 (Prusky and Douglas, 2003; Cooke et al., 2015). Adult (P67) female and male littermate mice  
218 were implanted with VEP recording electrodes in layer 4 of binocular primary visual cortex, a  
219 depth that yields the maximum negative going VEP (Huang et al., 1999; Sawtell et al., 2003).  
220 Head-fixed animals were shown phase reversing sinusoidal gratings with 8 spatial frequencies  
221 between 0.05 and 0.7 cycles per degree (**Figure 1A**). As the spatial frequency increases, the  
222 magnitude of evoked potentials decreases (Porciatti et al., 1999) and the point at which the VEP

223 asymptotes at the level of fluctuations recorded during gray-screen viewing identifies the upper  
224 limit of visual acuity (**Figure 1B**). While there is a clear and expected effect of stimulation  
225 spatial frequency on VEP magnitude ( $F_{7,200}=56.03, p<0.001$ ), this metric revealed no statistical  
226 difference between the visual acuity of female ( $n=11$ ) and male ( $n=16$ ) mice ( $F_{1,200}=1.96,$   
227  $p=0.16$ ) nor any interaction between sex and acuity ( $F_{7,200}=1.14, p=0.34$ ).

228 We next repeated the acuity measurement in females to determine whether estrous cycle  
229 has a statistical effect on visual responsiveness, grouping female mice based on cytology of  
230 vaginal leukocyte and epithelial content (**Figure 2**). We found that cycling occurred every 6-12  
231 days in an irregular and unpredictable manner (**Table 1**), with often rapid progressions though  
232 metestrus and proestrus that would make it difficult if not impossible to design multi-day  
233 plasticity experiments reliably occurring during specific stages of the cycle across yoked cohorts.  
234 Visual acuity was assessed at the peak of estrus ( $n=9$ ) and diestrus ( $n=10$ , **Figure 1B**). As with  
235 sex, there was a highly significant effect of spatial frequency ( $F_{7,136}=60.44, p<0.001$ ) but  
236 measured no acuity differences between estrus and diestrus ( $F_{1,136}=0.564, p=0.45$ ) and no  
237 significant interaction of the within and between animal factors ( $F_{7,136}=0.825, p=0.57$ ).

238

### 239 *Sex effects experience dependent plasticity*

240 Having established that there is no statistical difference in baseline visual physiology of either  
241 sex or estrous stage, we next attempted to determine whether sex modulates experience-  
242 dependent cortical plasticity. Stimulus-selective response potentiation (SRP) is a form of visual  
243 learning induced by daily presentations of a visual stimulus of a particular orientation (Frenkel et  
244 al., 2006; Cooke and Bear, 2010; Cooke et al., 2015). SRP is easily characterized by a significant  
245 potentiation of VEPs elicited by familiar stimuli and provides a robust measure of underlying

246 synaptic plasticity. This potentiation occurs over days and is selective for the spatial parameters  
247 of the stimulus used to induce it. SRP requires NMDAR signaling that results in AMPAR  
248 insertion at the synapse (Frenkel et al., 2006) and employs the mechanism of long-term synaptic  
249 potentiation (LTP) (Cooke and Bear, 2010) including in parvalbumin-positive interneurons  
250 (Kaplan et al., 2016). As mentioned above, these elements have been identified as potential  
251 mechanistic correlates of sex-dependent plasticity and might be expected to cause measurable  
252 plasticity differences between male and female mice.

253         Following the standard VEP implantation surgery, adult (approximately P67) littermate  
254 mice were presented with a phase-reversing 0.05 cy/° sinusoidal grating stimulus rotated to 45°  
255 every day for 5 days (**Figure 3A**). On the 5th day of the SRP experiment, the mice were also  
256 presented with a novel stimulus constructed by rotating the familiar stimulus to a new angle  
257 (135°). In accord with previous experiments, we found that VEP amplitudes evoked by the  
258 familiar visual stimulus increased significantly across presentation days in both male ( $n=16$ ) and  
259 female ( $n=11$ ) mice (**Figure 3B-C**,  $F_{4,125}=51.39$ ,  $p<0.001$ ), but there was no main effect of sex  
260 ( $F_{1,125}=1.57$ ,  $p=0.21$ ) or significant interaction ( $F_{4,125}=1.622$ ,  $p=0.173$ ). To isolate the effects of  
261 potentiation, statistics were calculated using VEP score normalized relative to in-group average  
262 response magnitudes on day 1, though the same conclusions follow if statistics are calculated  
263 using raw VEP values instead (data not shown, Day:  $F_{4,125}=48.84$ ,  $p<0.001$ ; Sex:  $F_{1,125}=3.37$ ,  
264  $p=0.07$ ; Sex\*Day:  $F_{4,125}=0.81$ ,  $p=0.52$ ). VEPs evoked on day 5 by the novel stimulus were  
265 significantly smaller than those evoked by the familiar stimulus in both male and female mice  
266 ( $F_{1,50}=93.19$ ,  $p<0.001$ ), there was a small but significant effect of sex ( $F_{1,50}=4.35$ ,  $p=0.04$ ) and no  
267 significant interaction ( $F_{1,50}=0.365$ ,  $p=0.55$ ). The effect of sex on day-5 familiar/novel

268 comparisons was moderate and relatively low power with these group sizes ( $\eta_p^2=0.08$ , observed  
269 power = 0.53).

270 SRP encodes spatial features of a visual image, but V1 is also capable of encoding the  
271 spatiotemporal aspects of a visual sequence (Gavornik and Bear, 2014; Sidorov et al., 2020;  
272 Finnie et al., 2021). Like SRP, this learning causes the magnitude of visually evoked responses  
273 recorded in V1 to potentiate over days. Unlike SRP, this learning does not require NMDA  
274 receptors and can be prevented by antagonizing muscarinic acetylcholine receptors in V1  
275 (Gavornik and Bear, 2014), and M2 receptors specifically (Sarkar et al., 2022). Given that  
276 increasing estrogen levels have been shown to enhance signaling in cholinergic basal forebrain  
277 neurons which project robustly to V1 (Gibbs, 1997; Towart et al., 2003), that estrogen can  
278 modulate the expression and function of mAChRs (Cardoso et al., 2004; Pereira et al., 2008),  
279 that M2 receptors have been implicated in estrogen-induced enhancement of hippocampal  
280 memory (Daniel and Dohanich, 2001; Daniel et al., 2005), and that involvement of  $7\alpha$ -Estradiol  
281 can modulate ocular dominance plasticity in rat V1 (Sengupta et al., 2019) we reasoned that this  
282 form of learning might be more susceptible to sex differences than SRP.

283 To determine whether sex impacts sequence learning, we measured VEPs in female  
284 ( $n=15$ ) and male ( $n=12$ ) mice in response to 200 presentations of a sequence of four oriented  
285 sinusoidal gratings (ABCD, where each letter represents a unique orientation; **Figure 3D**) for  
286 five days. On the fifth day, both groups were shown the trained sequence and a novel sequence  
287 constructed by reordering the same elements (DCBA). Sequence evoked potentials increased  
288 with training in both male and female groups (**Figure 3E**) and were quantified by averaging the  
289 peak-to-peak responses of elements B and C (which show the largest potentiation and are not  
290 biased by the large response that occurs when a patterned stimulus follow the gray screen, as

291 occurs in A and D) (**Figure 2F**). As in the SRP experiment, data was normalized by day 1  
292 averages to isolate potentiation. As expected, the increase across days in this metric was highly  
293 significant ( $F_{4,125}=16.88, p<0.001$ ). While responses in female mice potentiated less than they  
294 did in male mice (female:  $M=1.86, SD=0.84$ ; male:  $M=2.10, SD=1.07$ ) this was not a significant  
295 effect ( $F_{1,125}=3.09, p=0.08$ ) and there was no significant interaction ( $F_{4,125}=0.35, p=0.84$ ). Unlike  
296 in the SRP experiment, however, the interpretation of this data did change when statistics were  
297 calculated using raw voltage measurements (**Figure 2G**). In this case potentiation over days  
298 remained highly significant ( $F_{4,125}=16.51, p<0.001$ ), and there was also a highly significant  
299 effect of sex ( $F_{1,125}=14.56, p<0.001$ ), though still no significant interaction ( $F_{4,125}=0.613$   
300  $p=0.65$ ). The statistical effect of sex was large ( $\eta_p^2=0.10$ , observed power = 0.97) and resulted  
301 from responses that were larger in male mice than females (female:  $M=279.24, SD=125.45$ ;  
302 male:  $M=364.98, SD=187.28$ ). On day 5, the trained sequence ABCD drove larger responses  
303 than did the novel sequence DCBA ( $F_{1,50}=14.41, p<0.001$ ) though with no effect of sex  
304 ( $F_{1,50}=0.31, p=0.58$ ) or interaction ( $F_{1,50}=1.13, p=0.29$ ).

305

### 306 *Estrous stage effects experience dependent plasticity*

307       There is extensive data showing that estrogen fluctuation impacts plasticity and learning  
308 in the hippocampus (Maren et al., 1994; Li et al., 2004) and prefrontal cortex (Keenan et al.,  
309 2001), but there is little data on how sensory cortices are influenced by gonadal hormones  
310 (McEwen and Milner, 2017). We did not track or control for estrous cycle in the previous  
311 plasticity experiments. Since cycling occurs irregularly, it is possible that any effects of estrous  
312 phase on the induction or expression of plasticity averaged out across the population which could  
313 explain why there was no significant difference between the sexes in the 5-day SRP experiment.

314 To address this possibility, we implanted mice at approximately P56 (female mice reach sexual  
315 maturity at approximately 8 weeks old) and began accumulating staging records after surgical  
316 recovery. The experimental approach was to compare the evolution of plasticity in groups  
317 starting at opposite ends of the estrous cycle, i.e. diestrus and estrus. To this end, female mice  
318 that had completed at least one full estrous cycle were sorted into yoked groups and exposed to  
319 the SRP induction protocol (**Figure 4A**). As before, normalized VEP magnitudes increased  
320 significantly over days (**Figure 4B-C**,  $F_{4,115}=20.10$   $p<0.001$ ) and there was no interaction term  
321 ( $F_{4,115}=0.53$ ,  $p=0.71$ ), but VEPs in mice starting in diestrus potentiated ( $n=12$ ,  $M=1.71$ ,  
322  $SD=0.032$  on day 5) significantly more ( $F_{1,115}=5.404$ ,  $p=0.02$ ) than those starting in estrus  
323 ( $n=13$ ,  $M=1.51$ ,  $SD=0.20$ ) with a small effect size ( $\eta_p^2=0.05$ , observed power = 0.64). On day  
324 five, the response to the novel stimulus is significantly smaller than to the familiar ( $F_{1,46}=2.67$ ,  
325  $p<0.001$ ) with no significant effect of initial stage ( $F_{1,46}=2.08$ ,  $p=0.16$ ) or interaction ( $F_{1,46}=2.21$ ,  
326  $p<0.14$ ). When the analysis is repeated using raw voltage values, the effect of the estrous cycle is  
327 more pronounced. On day 1, VEPs from mice in diestrus ( $M=269.99$ ,  $SD=79.83$ ) were smaller  
328 than those starting in estrus ( $M=336.60$ ,  $SD=47.88$ ) with highly significant effects of day  
329 ( $F_{4,115}=21.99$ ,  $p<0.001$ ) and stage ( $F_{1,115}=16.54$ ,  $p<0.001$ ), though still without a significant  
330 interaction ( $F_{4,115}=0.22$ ,  $p=0.92$ ). Comparing means between staging groups across days using  
331 Bonferroni corrected t-tests revealed that the difference between estrus and diestrus was  
332 significant on day 1 ( $t(23)=2.05$ ,  $p=0.04$ ) and day 4 ( $t(23)=2.50$ ,  $p=0.01$ ). There was no  
333 significant difference between stage cohorts on any other day.

334         Though all mice were grouped by estrous cycle stage on the first day of SRP induction,  
335 we found the cycling to be irregular with a high variability within each group across the 5 days  
336 of measurements (**Table 1**) which made it difficult to determine the extent to which the

337 difference in estrous cycling averaged out in later days, and might explain the significant result  
338 on day 4 but not on days 2,3 or 5. In order to measure plasticity expression and induction within  
339 specific hormonal windows, we repeated the SRP experiment with a single day of exposure with  
340 testing occurring the following day (**Figure 4E**). Mice found to be in a different stage on day two  
341 (test day) relative to day one were removed from the data set (3 out of 17 mice were excluded for  
342 being in a different stage on day two, 2 diestrus animals entered estrus, 1 estrus mice entered  
343 diestrus). Analyzing normalized data (**Figure 4G**), we see that there is highly significant  
344 potentiation between days 1 and 2 ( $F_{1,24}=19.26, p<0.001$ ). Diestrus ( $n=8$ ) mice potentiate slightly  
345 more than estrus ( $n=6$ ) mice after one day of SRP training ( $F_{1,24}=0.02, p<0.001$ ) though this is a  
346 very small effect ( $\eta_p^2=0.001$ , observed power = 0.05). There is no significant interaction  
347 ( $F_{1,24}=0.02, p=0.88$ ). On day two, there is no significant effect of stage ( $F_{1,24}=0.14, p=0.71$ ) or  
348 interaction between stage and stimulus ( $F_{1,24}=0.01, p=0.94$ ), but there is a significant difference  
349 between VEPs evoked by the familiar and novel stims ( $F_{1,24}=15.89, p=0.001$ ). Analyzing raw  
350 voltages (data not shown) shows the same pattern, though the significant effect of stage between  
351 days 1 and 2 is noticeably larger ( $F_{1,24}=5.56, p=0.03, \eta_p^2=0.18$ , observed power = 0.62).  
352 Comparing Bonferroni corrected t-tests show that the difference between estrus and diestrus is  
353 significant only on day two (Day1:  $t(12)=1.21, p=0.24$ ; Day 2:  $t(12)=2.13, p=0.04$ ).

354       Having already found an effect of sequence between male and female mice, and owing to  
355 the difficulty of conducting an estrus-controlled 5-day experiment, we used the same abbreviated  
356 2-day training protocol for the sequence stimulus (**Figure 4H**). Even with this narrowed 24-hour  
357 window, 7 out of 30 animals were excluded for being in a different stage on day 2 than day 1 (3  
358 estrus animals entered metestrus, 2 diestrus entered proestrus, and 2 diestrus entered estrus).  
359 Analyzing normalized data showed that sequence responses potentiated significantly after one

360 day of training ( $F_{1,42}=8.50, p=0.01$ ), but surprisingly there was no significant difference  
361 ( $F_{1,42}=0.004, p=0.95$ ) between mice in estrus ( $n=12$ ) and diestrus ( $n=11$ ) nor was there a  
362 significant interaction between stage and day ( $F_{1,42}=0.004 p=0.95$ ). While the response to the  
363 novel sequence ( $M=1.26, SD=0.53$ ) was smaller on average than to the familiar sequence  
364 ( $M=1.47, SD=0.54$ ) after one day of training, this was not a significant effect ( $F_{1,42}=1.75 p=0.19$ )  
365 and there was no effect of stage ( $F_{1,42}=0.13 p=0.72$ ) or interaction ( $F_{1,42}=0.06, p=0.81$ ).  
366 Analyzing raw data produced the same result (Day:  $F_{1,42}=8.02, p=0.01$ ; Stage:  $F_{1,42}=0.41,$   
367  $p=0.52$ ; Stage\*Day:  $F_{1,42}=0.03, p=0.86$ ).

368

## 369 **Discussion**

370 Many studies have addressed visual acuity in males and females, and their findings of specific  
371 physiological measures showing sexual dimorphism are often contradictory ((Brabyn and  
372 McGuinness, 1979; La Marche et al., 1986; Mitchell et al., 1987; Abramov et al., 2012); but see  
373 also the lack of sex differences in (Ishigaki and Miyao, 1994)). There is a trend towards males  
374 having better acuity at high spatial frequencies (Burg, 1966; McGuinness, 1976) and females  
375 having larger amplitude VEPs overall (La Marche et al., 1986; Fein and Brown, 1987; Sharma et  
376 al., 2015). Rat data mirrors human findings in that female animals show larger VEPs (Dyer and  
377 Swartzwelder, 1978), but this effect is limited to low spatial frequencies (Seymour and Juraska,  
378 1997). Further, estrogen signaling has been reported to modulate several forms of visual  
379 recognition and memory in females (Penton-Voak et al., 1999; Resnick and Maki, 2001;  
380 Mazzocco et al., 2006). Our data does not reveal any statistically significant differences in visual  
381 responsiveness between male and female mice at either high or low spatial frequencies. We did  
382 see a trend towards female mice having larger VEPs in response to low spatial frequencies



383 (Figure 1A, 0.05 cycles/degree) in our first experiment, but in our SRP experiment VEPs in  
384 female mice started smaller than in males (Figure 2B, black line) and the relative magnitude of  
385 estrus/diestrus groups differed in our two staged SRP experiments (Figure 4B,F). These intra-  
386 cohort differences, which are fairly common, were within the standard errors of the data and  
387 underscore the importance of yoked treatment groups throughout the course of plasticity  
388 experiments.

389 Overall, our SRP findings suggest that sex and estrous cycle has only a small to modest  
390 effect on spatial learning requiring NMDARs. Our results show that sex and estrous cycle clearly  
391 affect sequence learning, however, which is not surprising given what we know about the  
392 mechanistic basis of this plasticity. Visual sequence learning requires muscarinic acetylcholine  
393 signaling (Gavornik and Bear, 2014; Sarkar et al., 2022), and there is abundant literature  
394 revealing that estrogen modulates cholinergic activity in the rat brain: choline acetyltransferase  
395 (ChAT) mRNA levels fluctuate across the estrous cycle (Gibbs, 1996, 1998) and estrogen  
396 administration increases ChAT mRNA (Luine and Hearn, 1990), ChAT protein expression  
397 (Gibbs, 1997), acetylcholine release (Gibbs et al., 1997; Gabor et al., 2003), and choline reuptake  
398 at the synapse (O'Malley et al., 1987; Singh et al., 1994). Furthermore, estrogen attenuates the  
399 effects of scopolamine in passive avoidance, demonstrating functional muscarinic cholinergic  
400 receptors are required for a different across-day learning task (Gibbs, 1998). This divergence  
401 between passive avoidance and visual sequence learning data may be attributable to differences  
402 in the impact of gonadal hormones on the hippocampus (which is required for passive avoidance  
403 (Best and Orr, 1973)) and primary sensory cortex.

404 The hippocampus is one of the brain regions most dramatically influenced by the  
405 presence or absence of estrogen (Spencer et al., 2008) and its presence is required for sequence

406 potentiation (Finnie et al., 2021), though the nature of this relationship is still under  
407 investigation. Sexual dimorphism has also been reported in the amygdala (Blume et al., 2017)  
408 and the prefrontal cortex (Duclot and Kabbaj, 2015; Evans and Hampson, 2015) and our results  
409 suggest potentially interesting parallels between sexual dimorphism in limbic system plasticity  
410 when compared to sensoricortical plasticity. This work also describes relatively simple plasticity  
411 assays in V1 that can potentially be used to probe the relation between sex hormones and  
412 functional plasticity *in vivo*.

413         How do our findings in the primary visual cortex relate to other cortical regions? It has  
414 been long recognized that cortical circuits are organized around a common architecture, leading  
415 to the hypothesis that all areas of the cortex implement a common set of algorithms (Creutzfeldt,  
416 1977) (Mountcastle, 1978) and the notion that visual circuits can be understood as a proxy for  
417 the rest of the cortex (Douglas and Martin, 1991). Shared computational mechanisms support  
418 both short and long term memory in various cortical regions (Himberger et al., 2018). These  
419 observations imply that our findings in V1 will be relevant in other cortical areas. However,  
420 there is currently a lack of studies addressing sexual dimorphism in different sensory modalities  
421 and it's possible there are interesting areas of divergence. For example, an individual study in S1  
422 has shown that nitric oxide signaling is necessary for male – but not female – whisker  
423 deprivation plasticity (Dachtler et al., 2012) suggesting that more complex experiments may  
424 reveal functionally relevant sex differences not yet explored in V1.

425         We assumed that our female mice would have 4-5 day cycles based on oft-stated rules for  
426 mice (Byers et al., 2012; Prendergast et al., 2014) and designed our SRP experimental timeline  
427 around this window (**Figure 4A**). However, our staging data (**Table 1**) illustrates that description  
428 of an estrogen “cycle”, with its implicit suggestion of predictable regularity, is something of a

429 misnomer in lab mice. Cycling in our mice was both longer (6-12 days on average) and more  
430 unpredictable than we expected. For this reason, we amended our recording timeline to eliminate  
431 as much variability as possible when recording staged Sequence Learning and limited our  
432 protocol to 24 hours (**Figure 4H**).

433         Several factors might explain this variability. First, exposure to male mice increases  
434 cycle regularity and decreases length (Whitten, 1956). This “Whitten effect”, however, occurs  
435 only through nearly direct contact with male urine or dirty bedding, and washing equipment  
436 between male and female mice is sufficient to avoid this confound. A second factor is age. A  
437 longitudinal study of lifetime estrous cycling (Nelson et al., 1982) detected regular 4-5 day  
438 cycles from 4 to 12 months of age, but cycles greater than 6 days were common for animals of 2-  
439 4 months (which includes our mice). The ability to combine housing of non-littermate females  
440 and reduce housing costs is a major advantage to including female mice, though this can effect  
441 estrous cycle length: individually housed females have 4-5 day regular cycles (Lamond, 1959)  
442 (Byers et al., 2012), 3-5 group-housed females have ~8 day cycles with a distribution spread  
443 from 4 to 14 days (Champlin, 1971), and 20 group-housed females often cease cycling altogether  
444 (Champlin, 1971; Ryan and Schwartz, 1977).

445         Female mice have been excluded from experiments, in part, due to concern that daily  
446 staging would be necessary to track estrus. Fortunately, our findings suggest that the effects of  
447 this variability can probably be ameliorated through simple in-group normalization of male and  
448 female mice. The practical difficulties designing multi-day yoked experiments are non-trivial and  
449 should be carefully considered for any studies where estrous cycle is found to play a significant  
450 role on measured outcomes. While these considerations are known to experts in the field, our  
451 own experience and conversations with colleagues whose primary focus is not endocrinology

452 suggest that many research labs underestimate the challenges associated with planning and  
453 executing experiments that track estrous cycle. Speaking to this group specifically: we found  
454 the methodology of (Dey et al., 2015) for daily staging referenced against the estrous cycle  
455 wheel graphic in Figure 1 of (Byers et al., 2012) to be effective. The process is fast (10 animals  
456 can be done in 15 minutes) and simple. The animals seemed unbothered by the process, and we  
457 noted neither signs of discomfort (e.g. squeaking) nor aggression (e.g., biting) during vaginal  
458 lavage. Other papers in the literature use various histological stains which require fixation or  
459 prolonged drying times (Cora et al., 2015) (McLean et al., 2012), but unstained leukocytes  
460 (**Figure 2 black circles**) and cornified epithelial cells (**Figure 2 white boxes**) are unambiguous,  
461 and nucleated epithelial cells (**Figure 2 black boxes**) are easily identifiable (for more unstained  
462 example images, see (Caligioni, 2009) and (Goldman et al., 2007)).

463         There are valid arguments for including both sexes in order to generate more complete  
464 database of primary research for use in developing medical treatments (Koss and Frick, 2017)  
465 and from those who plan to continue with male-only experiments (Eliot and Richardson, 2016).  
466 While our data could potentially be used to support either position, by showing an effect of sex it  
467 clearly suggests limits on the general applicability of conclusions based on plasticity experiments  
468 which exclude female mice or subject them to gonadectomies. There is also practical value in  
469 including both sexes related to animal resource utilization, potentially reducing cost and waste.  
470 Overall, we think the minimal additional effort required to control for the additional variability  
471 associated with mixed-sex cohorts is worth in most V1 plasticity experiments, particularly given  
472 the NIH imperative to include sex as a biological variable.

473

474

475 **Author Contributions**

476 R.W.S. and J.P.G designed all experiments. R.W.S. C.J. and J.P.G. analyzed data and wrote the  
477 manuscript. R.W.S. and C.J. conducted all experiments.

478

479 **Funding**

480 This work was funded by NIMH R00MH099654 and using lab startup funds provided by the  
481 Boston University Biology Department.

482

483 **References**

- 484 Abramov I, Gordon J, Feldman O, Chavarga A (2012) Sex & vision I: Spatio-temporal  
485 resolution. *Biol Sex Differ* 3:20.
- 486 Becker JB, Prendergast BJ, Liang JW (2016) Female rats are not more variable than male rats: a  
487 meta-analysis of neuroscience studies. *Biol Sex Differ* 7:34.
- 488 Beery AK, Zucker I (2011) Sex bias in neuroscience and biomedical research. *Neurosci*  
489 *Biobehav Rev* 35:565-572.
- 490 Best PJ, Orr J, Jr. (1973) Effects of hippocampal lesions on passive avoidance and taste aversion  
491 conditioning. *Physiol Behav* 10:193-196.
- 492 Blume SR, Freedberg M, Vantrease JE, Chan R, Padival M, Record MJ, DeJoseph MR, Urban  
493 JH, Rosenkranz JA (2017) Sex- and Estrus-Dependent Differences in Rat Basolateral  
494 Amygdala. *J Neurosci* 37:10567-10586.
- 495 Brabyn LB, McGuinness D (1979) Gender Differences in Response to Spatial-Frequency and  
496 Stimulus Orientation. *Percept Psychophys* 26:319-324.
- 497 Burg A (1966) Visual acuity as measured by dynamic and static tests: a comparative evaluation.  
498 *J Appl Psychol* 50:460-466.
- 499 Byers SL, Wiles MV, Dunn SL, Taft RA (2012) Mouse estrous cycle identification tool and  
500 images. *PLoS One* 7:e35538.
- 501 Caligioni CS (2009) Assessing reproductive status/stages in mice. *Curr Protoc Neurosci*  
502 Appendix 4:Appendix 4I.
- 503 Cardoso CC, Pereira RT, Koyama CA, Porto CS, Abdalla FM (2004) Effects of estrogen on  
504 muscarinic acetylcholine receptors in the rat hippocampus. *Neuroendocrinology* 80:379-386.
- 505 Champlin AK (1971) Suppression of oestrus in grouped mice: the effects of various densities and  
506 the possible nature of the stimulus. *J Reprod Fertil* 27:233-241.
- 507 Chen JR, Yan YT, Wang TJ, Chen LJ, Wang YJ, Tseng GF (2009) Gonadal hormones modulate  
508 the dendritic spine densities of primary cortical pyramidal neurons in adult female rat. *Cereb*  
509 *Cortex* 19:2719-2727.
- 510 Clayton JA, Collins FS (2014) Policy: NIH to balance sex in cell and animal studies. *Nature*  
511 509:282-283.

- 512 Cooke SF, Bear MF (2010) Visual experience induces long-term potentiation in the primary  
513 visual cortex. *J Neurosci* 30:16304-16313.
- 514 Cooke SF, Bear MF (2012) Stimulus-selective response plasticity in the visual cortex: an assay  
515 for the assessment of pathophysiology and treatment of cognitive impairment associated with  
516 psychiatric disorders. *Biol Psychiatry* 71:487-495.
- 517 Cooke SF, Komorowski RW, Kaplan ES, Gavornik JP, Bear MF (2015) Visual recognition  
518 memory, manifested as long-term habituation, requires synaptic plasticity in V1. *Nat Neurosci*  
519 18:262-271.
- 520 Cora MC, Kooistra L, Travlos G (2015) Vaginal Cytology of the Laboratory Rat and Mouse:  
521 Review and Criteria for the Staging of the Estrous Cycle Using Stained Vaginal Smears.  
522 *Toxicol Pathol* 43:776-793.
- 523 Creutzfeldt OD (1977) Generality of the functional structure of the neocortex.  
524 *Naturwissenschaften* 64:507-517.
- 525 Cyr M, Ghribi O, Thibault C, Morissette M, Landry M, Di Paolo T (2001) Ovarian steroids and  
526 selective estrogen receptor modulators activity on rat brain NMDA and AMPA receptors.  
527 *Brain Res Brain Res Rev* 37:153-161.
- 528 Dachtler J, Hardingham NR, Fox K (2012) The role of nitric oxide synthase in cortical plasticity  
529 is sex specific. *J Neurosci* 32:14994-14999.
- 530 Daniel JM, Dohanich GP (2001) Acetylcholine mediates the estrogen-induced increase in  
531 NMDA receptor binding in CA1 of the hippocampus and the associated improvement in  
532 working memory. *J Neurosci* 21:6949-6956.
- 533 Daniel JM, Hulst JL, Lee CD (2005) Role of hippocampal M2 muscarinic receptors in the  
534 estrogen-induced enhancement of working memory. *Neuroscience* 132:57-64.
- 535 Dey S, Chamero P, Pru JK, Chien MS, Ibarra-Soria X, Spencer KR, Logan DW, Matsunami H,  
536 Peluso JJ, Stowers L (2015) Cyclic Regulation of Sensory Perception by a Female Hormone  
537 Alters Behavior. *Cell* 161:1334-1344.
- 538 Douglas RJ, Martin KA (1991) A functional microcircuit for cat visual cortex. *J Physiol*  
539 440:735-769.
- 540 Duclot F, Kabbaj M (2015) The estrous cycle surpasses sex differences in regulating the  
541 transcriptome in the rat medial prefrontal cortex and reveals an underlying role of early  
542 growth response 1. *Genome Biol* 16:256.
- 543 Dyer RS, Swartzwelder HS (1978) Sex and strain differences in the visual evoked potentials of  
544 albino and hooded rats. *Pharmacol Biochem Behav* 9:301-306.
- 545 Eliot L, Richardson SS (2016) Sex in Context: Limitations of Animal Studies for Addressing  
546 Human Sex/Gender Neurobehavioral Health Disparities. *J Neurosci* 36:11823-11830.
- 547 Evans KL, Hampson E (2015) Sex differences on prefrontally-dependent cognitive tasks. *Brain*  
548 *Cogn* 93:42-53.
- 549 Fein G, Brown FF (1987) Gender differences in pattern reversal evoked potentials in normal  
550 elderly. *Psychophysiology* 24:683-690.
- 551 Fields RD (2014) NIH policy: mandate goes too far. *Nature* 510:340.
- 552 Finnie PSB, Komorowski RW, Bear MF (2021) The spatiotemporal organization of experience  
553 dictates hippocampal involvement in primary visual cortical plasticity. *Curr Biol* 31:3996-  
554 4008 e3996.
- 555 Frenkel MY, Sawtell NB, Diogo AC, Yoon B, Neve RL, Bear MF (2006) Instructive effect of  
556 visual experience in mouse visual cortex. *Neuron* 51:339-349.

- 557 Fritz AK, Amrein I, Wolfer DP (2017) Similar reliability and equivalent performance of female  
558 and male mice in the open field and water-maze place navigation task. *Am J Med Genet C*  
559 *Semin Med Genet* 175:380-391.
- 560 Gabor R, Nagle R, Johnson DA, Gibbs RB (2003) Estrogen enhances potassium-stimulated  
561 acetylcholine release in the rat hippocampus. *Brain Res* 962:244-247.
- 562 Gao M, Whitt JL, Huang S, Lee A, Mihalas S, Kirkwood A, Lee HK (2017) Experience-  
563 dependent homeostasis of 'noise' at inhibitory synapses preserves information coding in adult  
564 visual cortex. *Philosophical transactions of the Royal Society of London Series B, Biological*  
565 *sciences* 372.
- 566 Gavornik JP, Bear MF (2014) Learned spatiotemporal sequence recognition and prediction in  
567 primary visual cortex. *Nat Neurosci* 17:732-737.
- 568 Gazzaley AH, Weiland NG, McEwen BS, Morrison JH (1996) Differential regulation of  
569 NMDAR1 mRNA and protein by estradiol in the rat hippocampus. *J Neurosci* 16:6830-6838.
- 570 Gibbs RB (1996) Fluctuations in relative levels of choline acetyltransferase mRNA in different  
571 regions of the rat basal forebrain across the estrous cycle: effects of estrogen and  
572 progesterone. *J Neurosci* 16:1049-1055.
- 573 Gibbs RB (1997) Effects of estrogen on basal forebrain cholinergic neurons vary as a function of  
574 dose and duration of treatment. *Brain Res* 757:10-16.
- 575 Gibbs RB (1998) Levels of trkA and BDNF mRNA, but not NGF mRNA, fluctuate across the  
576 estrous cycle and increase in response to acute hormone replacement. *Brain Res* 810:294.
- 577 Gibbs RB, Hashash A, Johnson DA (1997) Effects of estrogen on potassium-stimulated  
578 acetylcholine release in the hippocampus and overlying cortex of adult rats. *Brain Res*  
579 749:143-146.
- 580 Goldman JM, Murr AS, Cooper RL (2007) The rodent estrous cycle: characterization of vaginal  
581 cytology and its utility in toxicological studies. *Birth Defects Res B Dev Reprod Toxicol*  
582 80:84-97.
- 583 Gould E, Woolley CS, Frankfurt M, McEwen BS (1990) Gonadal steroids regulate dendritic  
584 spine density in hippocampal pyramidal cells in adulthood. *J Neurosci* 10:1286-1291.
- 585 Himberger KD, Chien HY, Honey CJ (2018) Principles of Temporal Processing Across the  
586 Cortical Hierarchy. *Neuroscience*.
- 587 Huang S, Hugarir RL, Kirkwood A (2013) Adrenergic gating of Hebbian spike-timing-  
588 dependent plasticity in cortical interneurons. *J Neurosci* 33:13171-13178.
- 589 Huang S, Trevino M, He K, Ardiles A, Pasquale R, Guo Y, Palacios A, Hugarir R, Kirkwood A  
590 (2012) Pull-push neuromodulation of LTP and LTD enables bidirectional experience-induced  
591 synaptic scaling in visual cortex. *Neuron* 73:497-510.
- 592 Huang ZJ, Kirkwood A, Pizzorusso T, Porciatti V, Morales B, Bear MF, Maffei L, Tonegawa S  
593 (1999) BDNF regulates the maturation of inhibition and the critical period of plasticity in  
594 mouse visual cortex. *Cell* 98:739-755.
- 595 Ishigaki H, Miyao M (1994) Implications for dynamic visual acuity with changes in aged and  
596 sex. *Percept Mot Skills* 78:363-369.
- 597 Jazin E, Cahill L (2010) Sex differences in molecular neuroscience: from fruit flies to humans.  
598 *Nature reviews Neuroscience* 11:9-17.
- 599 Jeong JK, Tremere LA, Burrows K, Majewska AK, Pinaud R (2011) The mouse primary visual  
600 cortex is a site of production and sensitivity to estrogens. *PLoS One* 6:e20400.

- 601 Kaplan ES, Cooke SF, Komorowski RW, Chubykin AA, Thomazeau A, Khibnik LA, Gavornik  
602 JP, Bear MF (2016) Contrasting roles for parvalbumin-expressing inhibitory neurons in two  
603 forms of adult visual cortical plasticity. *Elife* 5.
- 604 Keenan PA, Ezzat WH, Ginsburg K, Moore GJ (2001) Prefrontal cortex as the site of estrogen's  
605 effect on cognition. *Psychoneuroendocrinology* 26:577-590.
- 606 Koss WA, Frick KM (2017) Sex differences in hippocampal function. *J Neurosci Res* 95:539-  
607 562.
- 608 La Marche JA, Dobson WR, Cohn NB, Dustman RE (1986) Amplitudes of visually evoked  
609 potentials to patterned stimuli: age and sex comparisons. *Electroencephalogr Clin*  
610 *Neurophysiol* 65:81-85.
- 611 Lamond DR (1959) Effect of stimulation derived from other animals of the same species on  
612 oestrous cycles in mice. *J Endocrinol* 18:343-349.
- 613 Li C, Brake WG, Romeo RD, Dunlop JC, Gordon M, Buzescu R, Magarinos AM, Allen PB,  
614 Greengard P, Luine V, McEwen BS (2004) Estrogen alters hippocampal dendritic spine shape  
615 and enhances synaptic protein immunoreactivity and spatial memory in female mice. *Proc*  
616 *Natl Acad Sci U S A* 101:2185-2190.
- 617 Luine V, Hearn M (1990) Spatial Memory Deficits in Aged Rats - Contributions of the  
618 Cholinergic System Assessed by Chat. *Brain Research* 523:321-324.
- 619 Maren S, De Oca B, Fanselow MS (1994) Sex differences in hippocampal long-term potentiation  
620 (LTP) and Pavlovian fear conditioning in rats: positive correlation between LTP and  
621 contextual learning. *Brain Res* 661:25-34.
- 622 Mazzocco MM, Singh Bhatia N, Lesniak-Karpiak K (2006) Visuospatial skills and their  
623 association with math performance in girls with fragile X or Turner syndrome. *Child*  
624 *Neuropsychol* 12:87-110.
- 625 McCarthy MM, Arnold AP, Ball GF, Blaustein JD, De Vries GJ (2012) Sex differences in the  
626 brain: the not so inconvenient truth. *J Neurosci* 32:2241-2247.
- 627 McEwen BS, Milner TA (2017) Understanding the broad influence of sex hormones and sex  
628 differences in the brain. *J Neurosci Res* 95:24-39.
- 629 McGuinness D (1976) Away from a unisex psychology: individual differences in visual sensory  
630 and perceptual processes. *Perception* 5:279-294.
- 631 McLean AC, Valenzuela N, Fai S, Bennett SA (2012) Performing vaginal lavage, crystal violet  
632 staining, and vaginal cytological evaluation for mouse estrous cycle staging identification. *J*  
633 *Vis Exp*:e4389.
- 634 Mitchell KW, Howe JW, Spencer SR (1987) Visual evoked potentials in the older population:  
635 age and gender effects. *Clin Phys Physiol Meas* 8:317-324.
- 636 Mogil JS, Chanda ML (2005) The case for the inclusion of female subjects in basic science  
637 studies of pain. *Pain* 117:1-5.
- 638 Mountcastle VB (1978) Brain mechanisms for directed attention. *J R Soc Med* 71:14-28.
- 639 Nelson JF, Felicio LS, Randall PK, Sims C, Finch CE (1982) A longitudinal study of estrous  
640 cyclicity in aging C57BL/6J mice: I. Cycle frequency, length and vaginal cytology. *Biol*  
641 *Reprod* 27:327-339.
- 642 O'Malley CA, Hautamaki RD, Kelley M, Meyer EM (1987) Effects of ovariectomy and estradiol  
643 benzoate on high affinity choline uptake, ACh synthesis, and release from rat cerebral cortical  
644 synaptosomes. *Brain Res* 403:389-392.
- 645 Penton-Voak IS, Perrett DI, Castles DL, Kobayashi T, Burt DM, Murray LK, Minamisawa R  
646 (1999) Menstrual cycle alters face preference. *Nature* 399:741-742.



- 647 Pereira RT, Porto CS, Godinho RO, Abdalla FM (2008) Effects of estrogen on intracellular  
648 signaling pathways linked to activation of muscarinic acetylcholine receptors and on  
649 acetylcholinesterase activity in rat hippocampus. *Biochem Pharmacol* 75:1827-1834.
- 650 Phillips SM, Sherwin BB (1992) Variations in memory function and sex steroid hormones across  
651 the menstrual cycle. *Psychoneuroendocrinology* 17:497-506.
- 652 Porciatti V, Pizzorusso T, Maffei L (1999) The visual physiology of the wild type mouse  
653 determined with pattern VEPs. *Vision Res* 39:3071-3081.
- 654 Prendergast BJ, Onishi KG, Zucker I (2014) Female mice liberated for inclusion in neuroscience  
655 and biomedical research. *Neurosci Biobehav Rev* 40:1-5.
- 656 Prusky GT, Douglas RM (2003) Developmental plasticity of mouse visual acuity. *Eur J Neurosci*  
657 17:167-173.
- 658 Resnick SM, Maki PM (2001) Effects of hormone replacement therapy on cognitive and brain  
659 aging. *Ann N Y Acad Sci* 949:203-214.
- 660 Richardson SS, Reiches M, Shattuck-Heidorn H, LaBonte ML, Consoli T (2015) Opinion: Focus  
661 on preclinical sex differences will not address women's and men's health disparities.  
662 *Proceedings of the National Academy of Sciences* 112:13419-13420.
- 663 Ryan KD, Schwartz NB (1977) Grouped female mice: demonstration of pseudopregnancy. *Biol*  
664 *Reprod* 17:578-583.
- 665 Sarkar S, Reyes CM, Jensen CM, Gavornik JP (2022) M2 receptors are required for  
666 spatiotemporal sequence learning in mouse primary visual cortex.  
667 *bioRxiv:2022.2002.2009.479792*.
- 668 Sawtell NB, Frenkel MY, Philpot BD, Nakazawa K, Tonegawa S, Bear MF (2003) NMDA  
669 receptor-dependent ocular dominance plasticity in adult visual cortex. *Neuron* 38:977-985.
- 670 Scharfman HE, Mercurio TC, Goodman JH, Wilson MA, MacLusky NJ (2003) Hippocampal  
671 excitability increases during the estrous cycle in the rat: a potential role for brain-derived  
672 neurotrophic factor. *J Neurosci* 23:11641-11652.
- 673 Sengupta DC, Lantz CL, Rumi MAK, Quinlan EM (2019) 17alpha Estradiol promotes plasticity  
674 of spared inputs in the adult amblyopic visual cortex. *Sci Rep* 9:19040.
- 675 Seymoure P, Juraska JM (1997) Vernier and grating acuity in adult hooded rats: the influence of  
676 sex. *Behav Neurosci* 111:792-800.
- 677 Shansky RM, Woolley CS (2016) Considering Sex as a Biological Variable Will Be Valuable for  
678 Neuroscience Research. *J Neurosci* 36:11817-11822.
- 679 Sharma R, Joshi S, Singh KD, Kumar A (2015) Visual Evoked Potentials: Normative Values and  
680 Gender Differences. *J Clin Diagn Res* 9:CC12-15.
- 681 Sidorov MS, Kim H, Rougie M, Williams B, Siegel JJ, Gavornik JP, Philpot BD (2020) Visual  
682 Sequences Drive Experience-Dependent Plasticity in Mouse Anterior Cingulate Cortex. *Cell*  
683 *Rep* 32:108152.
- 684 Singh M, Meyer EM, Millard WJ, Simpkins JW (1994) Ovarian steroid deprivation results in a  
685 reversible learning impairment and compromised cholinergic function in female Sprague-  
686 Dawley rats. *Brain Res* 644:305-312.
- 687 Spencer JL, Waters EM, Romeo RD, Wood GE, Milner TA, McEwen BS (2008) Uncovering the  
688 mechanisms of estrogen effects on hippocampal function. *Front Neuroendocrinol* 29:219-237.
- 689 Towart LA, Alves SE, Znamensky V, Hayashi S, McEwen BS, Milner TA (2003) Subcellular  
690 relationships between cholinergic terminals and estrogen receptor-alpha in the dorsal  
691 hippocampus. *J Comp Neurol* 463:390-401.

692 Warren SG, Humphreys AG, Juraska JM, Greenough WT (1995) LTP varies across the estrous  
693 cycle: enhanced synaptic plasticity in proestrus rats. *Brain Res* 703:26-30.  
694 Whitten WK (1956) Modification of the oestrous cycle of the mouse by external stimuli  
695 associated with the male. *J Endocrinol* 13:399-404.  
696 Woolley CS, McEwen BS (1992) Estradiol mediates fluctuation in hippocampal synapse density  
697 during the estrous cycle in the adult rat. *J Neurosci* 12:2549-2554.  
698

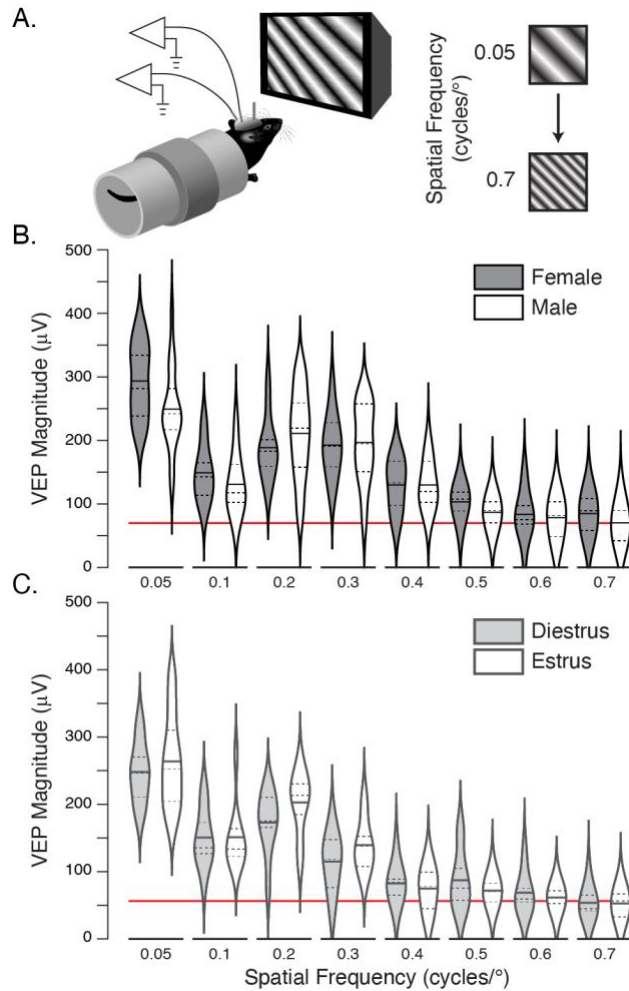

699

700 **Figure 1: Visual acuity as measured by VEPs is comparable in female and male mice**

701 **A.** Local field potentials are recorded from head-fixed mice (left) while they view phase-

702 reversing sinusoidal gratings with spatial frequencies varying from 0.05-0.7 (right). **B.** Violin

703 plots (dashed lines mark quartile boundaries and solid horizontal lines show the mean) showing

704 the peak-to-peak magnitude of VEPs recorded in female (shaded) and male (white) mice as a

705 function of spatial frequency. The red line marks the approximate noise-level recorded absent

706 visual stimulation. **C.** The same as in B, but for female mice in either estrus (shaded) or diestrus

707 (white). There is no effect of either sex or stage (see main text for statistical reporting).

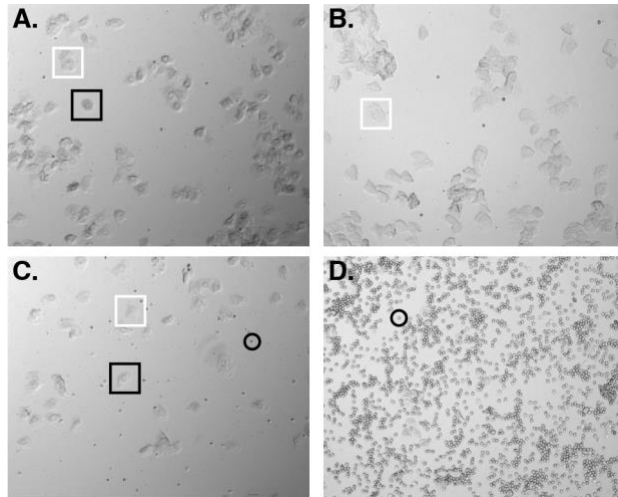

708

709 **Figure 2: Example images of estrous stages from unstained vaginal cytology**

710 Estrous cycle stage is determined by the presence of specific cell types. Nucleated epithelium,  
711 rounded with visible nucleus (*black boxes*). Cornified epithelium, flat, irregularly shaped with  
712 no visible nucleus (*white boxes*). Leukocytes, small and spherical (*black circles*). **A.** Proestrus,  
713 majority nucleated epithelium. **B.** Estrus, majority cornified epithelium. **C.** Metestrus, mix of  
714 cornified epithelium, nucleated epithelium, and leukocytes. **D.** Diestrus, majority leukocytes.

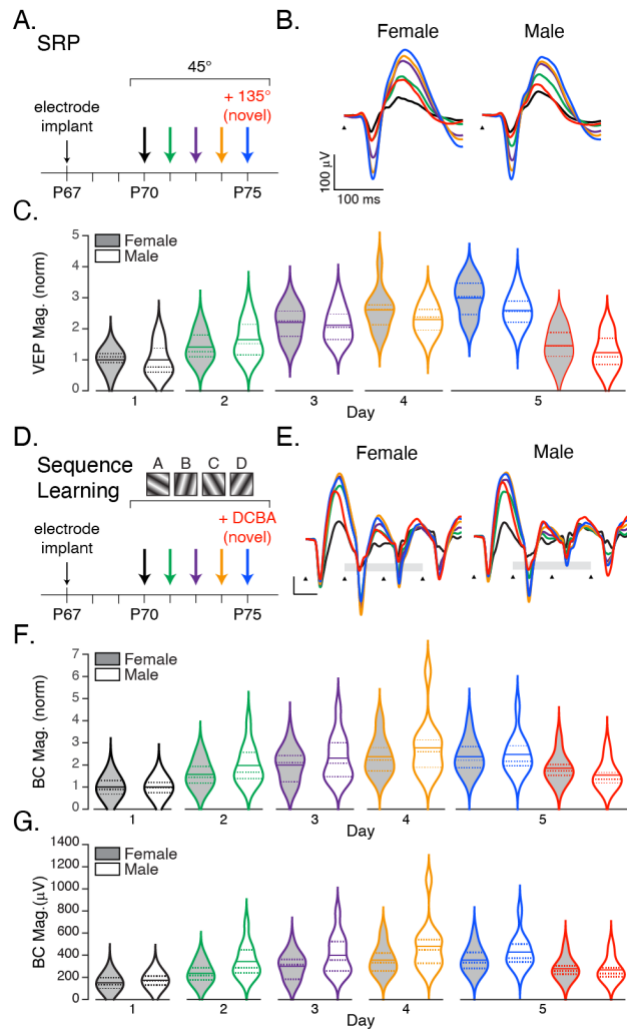

715

716 **Figure 3: Experience dependent cortical plasticity is affected by sex**

717 **A.** SRP experiment protocol. Animals were trained with repeated presentation of a 45° stimulus

718 over five days. On the 5<sup>th</sup> day, a novel stimulus (red, 135°) was interleaved with the familiar

719 stimulus (blue). **B.** Average VEP traces during SRP induction and expression in female and male

720 mice, color coded by day as in A. **C.** Violin plots showing the distribution of VEP magnitudes,

721 normalized to group averages on day 1, of female (shaded) and male (white) mice as a function

722 of experimental day. **D.** In Sequence Learning experiments, mice were shown 200 presentations

723 of the sequence ABCD every day for five days. On the fifth day, a novel sequence DCBA (red)

724 was interleaved with ABCD (blue). **E.** Group averaged sequence responses during sequence

725 learning (black triangles indicate sequence element onset times, the scale bar is 100  $\mu$ V by 100  
726 ms, color code as in D). Average quantified responses to elements B and C (indicated by the gray  
727 bars in E) of female (shaded) and male (white) animals normalized to day 1 group averages, F.  
728 and raw voltages, G. See main text for statistical reporting.  
729

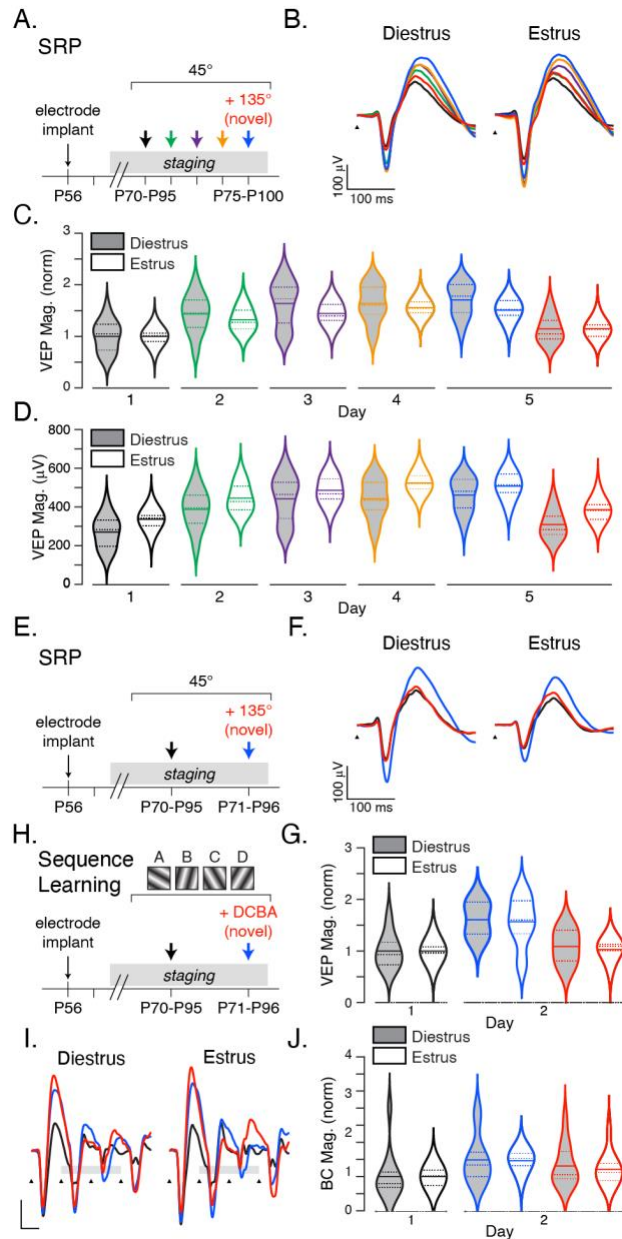

730

731 **Figure 4: Experience dependent cortical plasticity is effected by estrous stage.**

732 **A.** Five-day SRP experiments were conducted with animals grouped by estrous cycle stage on  
733 day 1. **B.** Average traces over SRP induction and expression. Normalized, **C.**, and raw, **D.**, VEP  
734 magnitudes for mice in diestrus (gray) and estrus (white) stage on day 1. **E.** Two-day SRP  
735 experiments were conducted in animals that were in the same estrus stage on both days 1 and 2.  
736 **F.** Average VEPs and **G.** normalized quantifications of animals in diestrus or estrus during

737 induction and expression. **H-J.** Two-day sequence learning experiment, average VEPs, and

738 quantification as in E-G.

739



740

| mouse | Days |   |   |   |   |   |   |   |   |    |    |    |    |    |    |    |    |    |    |    |    |    |    |    |    | Totals |   |    |   |
|-------|------|---|---|---|---|---|---|---|---|----|----|----|----|----|----|----|----|----|----|----|----|----|----|----|----|--------|---|----|---|
|       | 1    | 2 | 3 | 4 | 5 | 6 | 7 | 8 | 9 | 10 | 11 | 12 | 13 | 14 | 15 | 16 | 17 | 18 | 19 | 20 | 21 | 22 | 23 | 24 | 25 | P      | E | M  | D |
| 1     | E    | E | M | D | D | D | D | P | P | D  | D  | D  | D  | D  | P  | E  | E  | E  | E  | D  | D  | D  | P  | P  | 5  | 6      | 1 | 13 |   |
| 2     | M    | M | D | P | E | D | D | D | E | E  | M  | E  | D  | D  | D  | E  | E  | E  | M  | D  | D  | P  | E  | E  | 2  | 9      | 4 | 10 |   |
| 3     | E    | M | D | D | D | P | P | E | E | E  | E  | D  | D  | D  | D  | P  | M  | M  | D  | D  | D  | P  | E  | M  | 4  | 7      | 4 | 10 |   |
| 4     | D    | D | D | D | D | D | D | D | P | P  | D  | D  | D  | D  | D  | D  | D  | D  | D  | D  | D  | D  | D  | D  | 2  | 0      | 0 | 23 |   |
| 5     | E    | M | D | D | D | D | P | E | E | M  | D  | D  | D  | D  | P  | P  | D  | D  | D  | D  | D  | D  | D  | D  | 3  | 3      | 2 | 17 |   |
| 6     | D    | D | P | E | E | M | D | D | D | D  | P  | P  | P  | E  | D  | E  | E  | D  | D  | D  | D  | D  | D  | D  | 4  | 6      | 1 | 14 |   |
| 7     | P    | E | M | E | E | D | D | D | D | D  | P  | P  | P  | E  | D  | E  | E  | E  | D  | D  | D  | D  | D  | P  | 5  | 8      | 0 | 12 |   |
| 8     | E    | M | D | D | D | D | D | D | D | D  | P  | P  | P  | E  | D  | D  | D  | D  | D  | D  | D  | D  | D  | P  | 5  | 2      | 1 | 17 |   |
| 9     | M    | D | D | E | E | D | D | D | D | P  | P  | P  | D  | D  | D  | D  | E  | M  | D  | D  | D  | D  | D  | D  | 3  | 3      | 2 | 17 |   |
| 10    | E    | E | E | E | E | D | D | D | D | P  | M  | M  | D  | D  | P  | E  | E  | M  | D  | D  | D  | D  | P  | D  | 3  | 7      | 3 | 12 |   |
| 11    | E    | E | M | D | D | D | D | D | D | D  | D  | D  | D  | D  | D  | D  | P  | D  | D  | D  | D  | P  | E  | E  | 2  | 5      | 1 | 17 |   |
| 12    | E    | E | D | D | D | D | D | P | E | E  | M  | D  | D  | E  | E  | E  | E  | D  | D  | P  | E  | E  | D  | D  | 2  | 10     | 1 | 12 |   |
| 13    | P    | M | E | M | M | D | D | D | D | D  | D  | D  | D  | D  | D  | P  | D  | E  | D  | D  | D  | P  | E  | E  | 3  | 4      | 3 | 15 |   |
| 14    | D    | P | E | D | D | D | D | D | D | D  | D  | D  | D  | D  | P  | E  | E  | D  | D  | D  | E  | M  | D  | D  | 2  | 5      | 1 | 17 |   |
| 15    | E    | E | M | M | D | D | D | D | D | D  | D  | D  | D  | D  | D  | D  | E  | E  | M  | D  | E  | E  | M  | D  | 0  | 6      | 4 | 15 |   |
| 16    | P    | E | M | D | D | D | D | D | D | D  | D  | D  | E  | E  | E  | P  | E  | E  | E  | M  | E  | M  | D  | D  | 2  | 8      | 3 | 12 |   |
| 17    | E    | E | M | D | D | D | D | D | D | D  | D  | D  | D  | D  | D  | P  | E  | E  | D  | D  | E  | E  | E  | M  | 1  | 7      | 2 | 15 |   |
| 18    | P    | E | D | D | D | D | D | D | D | D  | D  | D  | P  | E  | E  | E  | E  | E  | D  | D  | P  | E  | E  | E  | 3  | 9      | 0 | 13 |   |
| 19    | E    | E | M | E | D | D | D | D | D | D  | P  | P  | M  | M  | M  | D  | M  | M  | D  | D  | P  | E  | E  | E  | 3  | 6      | 6 | 10 |   |
| 20    | D    | P | M | D | D | D | D | D | D | D  | D  | D  | D  | D  | D  | P  | D  | D  | D  | D  | D  | P  | E  | E  | 3  | 2      | 1 | 19 |   |
| 21    | D    | P | M | E | D | D | D | E | E | D  | M  | P  | E  | E  | E  | E  | M  | D  | D  | D  | D  | E  | M  | M  | 2  | 8      | 5 | 10 |   |
| 22    | E    | E | M | M | M | D | D | D | P | D  | D  | P  | E  | E  | E  | E  | E  | M  | D  | P  | E  | E  | E  | D  | 3  | 11     | 4 | 7  |   |
| 23    | E    | E | E | D | D | D | P | E | E | E  | E  | E  | E  | M  | D  | D  | P  | E  | E  | E  | D  | D  | D  | D  | 2  | 12     | 1 | 10 |   |
| 24    | P    | E | D | E | M | D | D | D | D | D  | P  | P  | E  | E  | E  | E  | E  | E  | M  | D  | P  | E  | E  | E  | 4  | 11     | 2 | 8  |   |
| 25    | P    | P | D | D | D | D | D | D | D | P  | P  | E  | E  | E  | E  | E  | E  | M  | M  | D  | D  | E  | M  | M  | 4  | 7      | 4 | 10 |   |
| 26    | D    | P | M | M | D | D | D | D | D | P  | E  | E  | E  | E  | E  | E  | D  | D  | D  | D  | D  | P  | E  | E  | 3  | 8      | 2 | 12 |   |
| 27    | E    | P | E | D | D | D | D | D | E | E  | E  | E  | E  | M  | D  | D  | D  | D  | D  | P  | E  | E  | E  | E  | 2  | 13     | 1 | 9  |   |
| 28    | D    | D | D | D | D | D | D | P | E | E  | E  | E  | E  | E  | E  | M  | D  | D  | D  | D  | D  | E  | E  | D  | 1  | 9      | 1 | 14 |   |
| 29    | E    | E | E | D | D | D | P | E | M | E  | E  | E  | M  | D  | D  | P  | E  | E  | M  | D  | D  | E  | E  | M  | 2  | 10     | 4 | 9  |   |
| 30    | E    | E | E | E | E | E | E | D | D | P  | E  | E  | E  | M  | D  | D  | D  | P  | E  | E  | D  | E  | E  | M  | 3  | 14     | 2 | 6  |   |
| 31    | M    | D | D | P | P | P | D | D | D | P  | M  | D  | D  | M  | D  | E  | E  | M  | M  | E  | E  | E  | E  | M  | 4  | 6      | 6 | 9  |   |
| 32    | M    | M | D | P | D | P | D | D | P | D  | D  | D  | E  | M  | D  | D  | D  | E  | E  | P  | E  | E  | E  | E  | 4  | 7      | 3 | 11 |   |
| 33    | E    | E | D | D | D | P | P | P | P | P  | E  | E  | E  | E  | E  | E  | E  | E  | M  | M  | D  | D  | E  | E  | 5  | 12     | 2 | 6  |   |
| 34    | E    | E | E | E | M | D | D | D | E | E  | D  | D  | D  | P  | E  | E  | E  | D  | D  | E  | E  | M  | E  | E  | 1  | 14     | 2 | 8  |   |
| 35    | E    | E | E | E | M | D | D | D | E | E  | D  | P  | M  | E  | E  | M  | D  | D  | P  | P  | D  | D  | D  | D  | 3  | 8      | 3 | 11 |   |
| 36    | E    | E | E | E | E | E | M | D | D | P  | P  | P  | D  | D  | E  | E  | E  | E  | D  | E  | E  | E  | M  | M  | 4  | 13     | 3 | 5  |   |
| 37    | E    | E | E | E | E | M | D | D | D | P  | M  | D  | E  | D  | E  | E  | E  | D  | P  | D  | D  | D  | D  | D  | 2  | 10     | 2 | 11 |   |
| 38    | E    | M | D | D | D | D | D | D | D | E  | D  | P  | D  | P  | D  | D  | D  | P  | D  | P  | E  | E  | E  | E  | 4  | 6      | 1 | 14 |   |
| 39    | E    | E | E | D | D | P | E | E | M | M  | D  | D  | P  | D  | D  | D  | E  | E  | M  | E  | E  | E  | E  | M  | 2  | 11     | 4 | 8  |   |
| 40    | M    | P | E | M | E | E | E | E | M | E  | E  | E  | D  | M  | E  | E  | E  | E  | E  | M  | M  | D  | D  | E  | 1  | 15     | 6 | 3  |   |
| 41    | E    | D | D | P | P | P | E | E | D | D  | D  | E  | E  | M  | D  | D  | D  | D  | D  | D  | D  | D  | P  | E  | 4  | 6      | 1 | 14 |   |
| 42    | E    | M | D | D | E | E | E | D | D | E  | E  | M  | E  | D  | D  | D  | E  | E  | M  | D  | D  | D  | P  | E  | 1  | 12     | 3 | 9  |   |
| 43    | E    | E | D | D | E | E | E | M | D | P  | D  | E  | M  | D  | P  | P  | M  | M  | E  | E  | E  | M  | D  | D  | 3  | 10     | 5 | 7  |   |
| 44    | E    | E | M | D | E | E | E | E | D | D  | E  | E  | M  | D  | D  | D  | E  | E  | E  | D  | D  | D  | E  | E  | 0  | 16     | 2 | 7  |   |
| 45    | D    | D | D | D | P | E | E | E | E | E  | E  | E  | D  | D  | D  | P  | E  | E  | E  | E  | M  | E  | E  | E  | 2  | 14     | 1 | 8  |   |
| 46    | E    | E | E | E | D | P | D | E | D | D  | D  | E  | E  | E  | E  | E  | M  | M  | E  | E  | M  | D  | D  | D  | 1  | 12     | 3 | 9  |   |
| 47    | E    | D | P | D | P | E | E | E | E | E  | E  | E  | D  | P  | D  | D  | E  | E  | E  | D  | D  | D  | E  | E  | 4  | 13     | 0 | 8  |   |
| 48    | E    | M | D | D | D | P | E | E | E | E  | E  | E  | E  | M  | E  | E  | E  | E  | E  | M  | M  | D  | D  | E  | 1  | 15     | 4 | 5  |   |
| 49    | P    | E | D | D | D | E | E | E | E | E  | M  | D  | E  | E  | E  | E  | E  | E  | E  | M  | M  | D  | P  | E  | 2  | 15     | 3 | 5  |   |

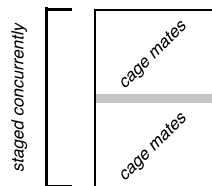

741

742 **Table 1: Estrous cycling in example animals**

743 Proestrus (*P*), estrus (*E*), metestrus (*M*), and diestrus (*D*)
